# Supplementary material
Source: HighWire-hosted journal article supplement (https://meilu.jpshuntong.com/content/suppl/2016/03/22/352.feb26_5.i1049)
Supplement: bmj.i1049.pdf [file bmj.i1049.pdf]

# Vírus da Zika

Marina Basarab,<sup>1</sup> Conor Bowman,<sup>1</sup> Emma J Aarons,<sup>2</sup> Ian Cropley,<sup>1</sup>

<sup>1</sup>Department of Infectious Diseases, Royal Free London NHS Foundation Trust, London NW3 2QG, UK

<sup>2</sup>Rare and Imported Pathogens Laboratory, Public Health England, Porton Down, UK

Correspondência para: I Cropley iancropley@nhs.net

Cite this as: *BMJ* 2016;352:i1049  
http://dx.doi.org/10.1136/bmj.i1049

O vírus da Zika se dissemina rapidamente nas Américas. O vírus foi identificado no final da década de 1940 na África, mas foi confirmado pela primeira vez no Brasil em maio de 2015. Desde então, foi identificado em mais de 27 países e territórios da região.<sup>1,2</sup> A disseminação para as Américas foi predita, por conta da abundância do mosquito vetor, o *Aedes aegypti*.<sup>3-6</sup> Médicos de todo o mundo precisam estar cientes da infecção pelo vírus da Zika por conta de viagens internacionais e presença de outro mosquito vetor possivelmente competente (*Aedes albopictus*) na América do Norte e no sul da Europa. Algumas regiões brasileiras passando por surtos de infecção de Zika relataram um aparente aumento na microcefalia congênita e síndromes neurológicas pós-infecciosas, especialmente a síndrome de Guillain-Barré (consulte os Quadros 1 e 2).<sup>2</sup> A associação dessas condições com a infecção pelo vírus da Zika atualmente não é comprovada e está sob investigação. Em 1º de fevereiro de 2016, a Organização Mundial da Saúde declarou emergência de saúde pública de preocupação internacional em relação à recente concentração geográfica de microcefalia e outros transtornos neurológicos relatados no Brasil, após uma concentração geográfica semelhante na Polinésia Francesa em 2014.<sup>7</sup> Se for confirmado que a infecção pelo vírus da Zika causa microcefalia congênita, isso pode acarretar um grande fardo internacional de morbidade neurológica de neonatos. A infecção pelo vírus da Zika deve ser considerada em pessoas que apresentam sintomas compatíveis e retornaram recentemente de países onde surtos da infecção estão ocorrendo. Essa análise apresenta informações atualizadas no momento da publicação sobre o vírus da Zika, sua epidemiologia em evolução, como reconhecer o quadro clínico, possíveis complicações e como confirmar o diagnóstico.

## O que é o vírus da Zika?

O vírus da Zika é um arbovírus (vírus transmitido por artrópodes). Ele pertence à família Flaviviridae, gênero *Flavivirus*, que inclui os vírus da dengue, da febre

amarela e da febre do Nilo Ocidental. Foi identificado pela primeira vez em 1947 na floresta de Zika, próximo a Kampala, Uganda, em macacos rhesus.<sup>8</sup>

O vírus da Zika tem RNA de fita simples, com duas linhagens principais: asiática e africana.<sup>4,9,10</sup> Na África, acredita-se que o vírus da Zika tenha sido amplamente mantido em um ciclo envolvendo transmissão entre primatas não humanos (como macacos) e mosquitos, sendo os humanos hospedeiros não intencionais ocasionais.<sup>11,12</sup> Fora da África, no entanto, os humanos provavelmente se tornaram o principal hospedeiro.<sup>3</sup>

Poucas sequências completas do genoma do vírus da Zika estão disponíveis e, até aqui, somente duas são da epidemia atual na América do Sul. A análise filogenética do vírus da Zika no Suriname indica que ele pertence ao genótipo asiático. Ele está mais estreitamente relacionado à cepa que estava circulando na Polinésia Francesa em 2013, compartilhando mais de 99.7% e 99.9% da identidade de nucleotídeo e aminoácidos, respectivamente.<sup>13</sup> Este achado é consistente com a análise de sequências genéticas do envelope viral de pacientes brasileiros.<sup>14,15</sup> Uma mutação da linhagem asiática pode ter feito o vírus se adaptar ao hospedeiro humano (ao contrário do primata não humano).<sup>16</sup>

Até há pouco tempo, o vírus da Zika tinha menor prioridade de pesquisa que outros flavivírus, pois não era considerado importante para a saúde pública. Existe uma literatura limitada sobre a patogênese do vírus da Zika para ajudar a entender o espectro da doença clínica e focar em tratamentos para minimizar ou evitar danos teciduais.<sup>17,18</sup> O vírus da Zika replica prontamente nas células imunes da pele e um grande número de receptores podem mediar a entrada do vírus nas células.<sup>18</sup> Estudos sobre a capacidade de os vírus se replicarem em células neuronais são necessários para melhor investigar a ligação a transtornos neurológicos.

## Epidemiologia

De 1947, no primeiro isolamento do vírus da Zika em macacos, até 2007, relatos de casos humanos eram raros e esporádicos.<sup>8,19,20</sup> Evidências quanto à extensão de infecção em humanos se baseavam principalmente em estudos sorológicos e, em alguns casos, isolamento do vírus.<sup>19,21-25</sup> O isolamento viral sugeriu uma ampla distribuição na África e no sudeste da Ásia, embora nenhuma epidemia tenha sido observada.

Em 2007, um surto causado por uma cepa da linhagem asiática ocorreu na ilha de Yap, um estado insular dos Estados Federados da Micronésia.<sup>3,4</sup> Casos estimados afetados neste e em surtos subsequentes até o momento provavelmente são imprecisos, haja vista a incompletude de confirmação laboratorial e semelhanças no quadro clínico do vírus da Zika com outras infecções por arbovírus presentes nos trópicos. Em Yap, 49 casos confirmados e 59 casos prováveis (definidos de

## O que você precisa saber

- O vírus da Zika, transmitido por mosquitos, se disseminou com rapidez recentemente nas Américas, e é provável que se dissemine ainda mais na presença de mosquitos *Aedes*
- A infecção pelo vírus da Zika causa uma enfermidade leve, com febre, erupção cutânea, conjuntivite, artralgia e mialgia, ou pode ser subclínica
- Algumas regiões brasileiras que apresentam surto de infecção pelo vírus da Zika relataram um aumento aparente na microcefalia congênita. Alguns países onde há surtos declararam aumento nas síndromes neurológicas pós-infecciosas, especialmente a síndrome de Guillain-Barré. A associação com o vírus da Zika ainda precisa ser confirmada
- A situação está mudando rapidamente, e devem-se obter orientações atualizadas sobre viagem às áreas afetadas, especialmente com relação à gestação e à transmissão sexual

### Quadro 1 | relatos de caso de infecção pelo vírus da zika

- Vírus da Zika detectado por reação em cadeia da polimerase no líquido amniótico de dois bebês com microcefalia no nordeste brasileiro<sup>15</sup>
- Evidência sorológica de infecção anterior por vírus da Zika identificada no Havaí em um bebê com microcefalia congênita cuja mãe residiu no Brasil durante a gestação<sup>57</sup>
- No nordeste brasileiro, o vírus da Zika foi detectado no tecido cerebral de dois neonatos com microcefalia que foram a óbito 20 horas após o nascimento, e no tecido placentário de dois abortos espontâneos precoces. As quatro mães relataram enfermidades compatíveis com infecção pelo vírus da Zika no primeiro trimestre da gestação<sup>58</sup>
- Vírus da Zika detectado por reação em cadeia da polimerase no tecido cerebral fetal de gestação interrompida de fetos microcefálicos na Eslovênia. A mãe havia estado no nordeste brasileiro no primeiro trimestre da gestação<sup>59</sup>

### Quadro 2 | Aumento relatado da síndrome de Guillain-Barré e síndromes neurológicas pós-infecciosas

- Aumentos relatados na síndrome de Guillain-Barré estão associados com os surtos de vírus da Zika no Brasil, em El Salvador, na Colômbia, no Suriname e na Venezuela<sup>2</sup>
- 50 dos 66 (76%) casos de síndrome de Guillain-Barré na Venezuela indicaram história clínica consistente com infecção pelo vírus da Zika, com detecção do vírus da Zika por reação em cadeia da polimerase em três pacientes<sup>2</sup>
- 1708 casos de síndrome de Guillain-Barré registrados no Brasil em 2015, um aumento de 19% em comparação com 1439 casos no ano anterior. Em 42 pessoas com síndrome de Guillain-Barré confirmada, 26 (62%) forneceram história de sintomas consistentes com infecção pelo vírus da Zika<sup>2</sup>
- Das 42 pessoas com síndrome de Guillain-Barré confirmada na Polinésia Francesa, 37 (88%) relataram enfermidade consistente com infecção pelo vírus da Zika. Todas tiveram evidências sorológicas de infecção por flavivírus<sup>2,52</sup>
- Em duas pessoas com síndrome de Guillain-Barré na Martinica, a infecção pelo vírus da Zika foi confirmada por teste positivo de reação em cadeia da polimerase em urina<sup>60</sup>

### Fontes e critérios de seleção

Pesquisamos os bancos de dados Medline e Embase quanto artigos publicados sobre o vírus da Zika usando o termo “Zika” e verificamos a bibliografia de todos os artigos com texto completo recuperados. Para informações não publicadas, pesquisamos a ProMed. Também acessamos informações essenciais de sites de saúde pública nacionais e internacionais, inclusive o Centro Europeu de Prevenção e Controle de Doenças (European Centre for Disease Prevention and Control – <http://ecdc.europa.eu/>), a Organização Mundial da Saúde ([www.who.int/](http://www.who.int/)) e a Organização Pan-Americana da Saúde ([www.paho.org/](http://www.paho.org/)), e pesquisamos as bibliografias de todos os alertas e avaliações de risco emitidos por essas organizações.

acordo com critérios sorológicos rigorosos ou detecção de RNA por reação em cadeia da polimerase via transcriptase reversa) foram identificados ao longo de um período de quatro meses.<sup>3</sup> Com base em um teste sorológico, estima-se que 73% da população da ilha tenha sido infectada ao longo de três anos.

Outro surto ocorreu com uma cepa de linhagem asiática estreitamente relacionada na Polinésia Francesa, em 2013, no qual 294 casos foram confirmados por detecção de RNA ao longo de um período de 10 semanas.<sup>26,27</sup> Casos contraídos localmente (pessoas sem história de viagem a áreas sabidamente endêmicas dentro do período de incubação reconhecido) na Ilha de Páscoa em 2014 marcaram a chegada do vírus da Zika às Américas.<sup>28</sup> A isso se seguiu, em maio de 2015, a confirmação de casos no nordeste brasileiro, onde novamente a sequência de vírus pertencente à linhagem asiática foi encontrada.<sup>14,29</sup>

O vírus da Zika é novo nas Américas e não há imunidade dentro da população. A rápida disseminação e o grande número de casos reflete a chegada recente do vírus chikungunya nas Américas, em 2013.

Como a maioria das pessoas com infecção pelo vírus da Zika pode não se apresentar para atendimento médico, é problemático estimar o número total de casos infectados com base nos números de casos clinicamente suspeitos e confirmados em laboratório. As estimativas são influenciadas por critérios usados para definição de caso suspeito e por suposições feitas quanto à proporção de infecções subclínicas. As autoridades brasileiras estimam que cerca de 1.5 milhão de casos de infecção pelo vírus da Zika ocorreram desde o início do surto.<sup>2</sup> A Colômbia relatou transmissão local em outubro de 2015, agora com mais de 25 000 casos

suspeitos. A Figura 1 mostra as áreas com casos confirmados contraídos localmente nos últimos nove meses.<sup>2</sup>

### Como o vírus é transmitido?

Acredita-se que o principal vetor do vírus da Zika seja o mosquito urbano *Aedes aegypti*, que pica durante o dia (dentro e fora de casa). Evidências para dar suporte a isso vêm da detecção do vírus no *A. aegypti* selvagem e por transmissão experimental em macacos rhesus.<sup>30-32</sup> Após a alimentação em laboratório de mosquitos *Aedes albopictus* com sangue infectado pelo vírus da Zika, o vírus foi demonstrado na saliva do mosquito, sugerindo que esses mosquitos também podem transmitir o vírus.<sup>33,34</sup>

A transmissão sexual presuntiva foi relatada em dois casos.<sup>35,36</sup> Isolamento do vírus no sêmen 17 dias após o diagnóstico clínico de infecção aguda embasa a transmissão sexual em potencial, assim como a detecção do RNA do vírus da Zika no sêmen 62 dias após o início dos sintomas.<sup>37,38</sup>

O vírus da Zika foi detectado em aproximadamente 3% dos doadores de sangue assintomáticos durante o surto na Polinésia Francesa,<sup>39</sup> sugerindo que a transmissão pode ser possível por sangue e hemoderivados infectados.

As evidências implicam transmissão transplacentária e transmissão perinatal durante o parto, com o RNA do vírus da Zika sendo encontrado no líquido amniótico<sup>15</sup> e em amostras de sangue pareadas colhidas de neonatos e mães.<sup>40</sup>

Atualmente não existem evidências para dar suporte à transmissão via contato com saliva, urina ou gotículas respiratórias.

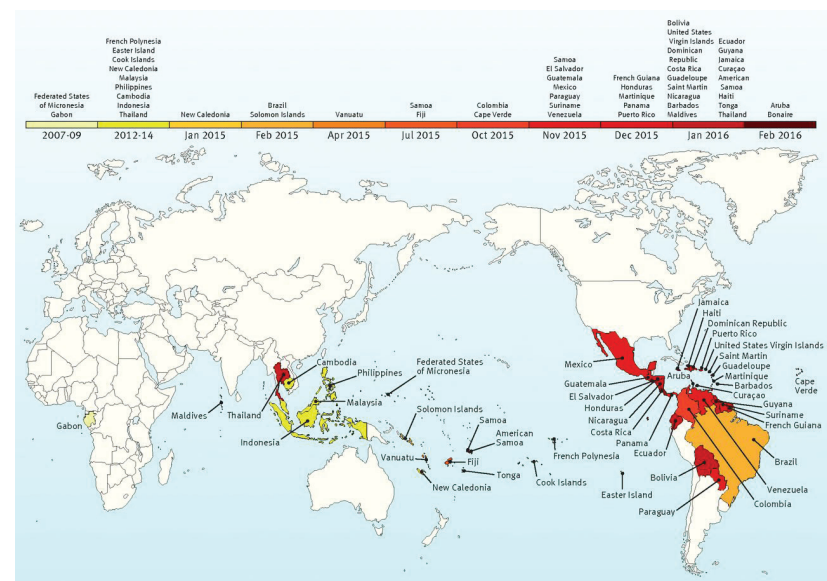

**Fig 1 |** Áreas de infecção pelo vírus da Zika adquirida localmente, de junho a fevereiro de 2016. Adaptado do relatório situacional da Organização Mundial da Saúde, 19 de fevereiro de 2016<sup>2</sup>

## Como o vírus da Zika se apresenta?

As infecções pelo vírus da Zika parecem ser subclínicas (possivelmente em até 80% das infecções) ou causar uma leve enfermidade após o período de incubação de três a 12 dias. Os sintomas, que duram por aproximadamente dois a sete dias, incluem febre, conjuntivite, artralgia, mialgia e erupção cutânea disseminada, que pode ser pruriginosa. Cefaleia, dor retro-orbital, edema periférico e distúrbios gastrointestinais também foram observados.<sup>3 41-43</sup>

Somente um estudo examinou a proporção de infecções que produzem sintomas. Uma pesquisa sorológica durante o surto de Yap descobriu que somente 19% dos participantes com anticorpos IgM contra o vírus da Zika apresentaram erupção cutânea, dor articular ou conjuntivite, que eram provavelmente atribuíveis à infecção pelo vírus da Zika. Não foi relatado se os outros participantes infectados apresentaram algum outro sintoma.<sup>3</sup> A proporção de pessoas infectadas que não apresentam sintomas não é conhecida. A observação de viremia da Zika em 31 doadores de sangue da Polinésia Francesa que não relataram sintomas nem durante nem após a doação de sangue, sugere que a infecção assintomática de fato ocorre.<sup>39</sup>

Choque e hemorragia ocorrem com outros flavivírus, como a dengue, mas esses sintomas não foram documentados na infecção pelo vírus da Zika. A enfermidade aguda grave parece ser rara. Menos de 10 possíveis óbitos relacionados à Zika foram relatados em adultos, e outros três óbitos decorrentes da síndrome de Guillain-Barré ocorreram em pessoas que apresentavam sintomas de infecção pelo vírus da Zika.<sup>44 45</sup>

### Existe evidência de associação entre infecção e complicações?

Os dados epidemiológicos atuais sugerem vínculos espaciais e temporais com a epidemia do vírus da Zika

e de microcefalia congênita. Isso é embasado por relatos de caso de detecção do vírus no líquido amniótico ou no tecido cerebral de fetos afetados. Estudos epidemiológicos robustos com claras definições de microcefalia estão sendo feitos para testar se alguma associação com a infecção pelo vírus da Zika pode ser confirmada.

A microcefalia geralmente resulta do desenvolvimento cerebral anormal (consulte o Quadro 3 para conhecer as causas da microcefalia). Não existe definição internacionalmente aceita de microcefalia. O Ministério da Saúde brasileiro está usando agora uma definição de perímetro cefálico inferior a 2 desvios-padrão (3 desvios-padrão para microcefalia grave) abaixo da média para o sexo e idade gestacional no nascimento.<sup>46</sup>

Mais de 85% dos casos de microcefalia, desde novembro de 2015, foram relatados no estado da Paraíba, nordeste brasileiro. Os casos relatados de microcefalia aumentaram de 5,7 a cada 100 000 nascimentos vivos, em 2010, para 99,7 a cada 100 000 nascimentos vivos, de novembro de 2015 a janeiro de 2016.<sup>47</sup> Ainda não está claro se este é um aumento real, aumento de casos graves ou aumento na investigação. A Colômbia, onde o vírus da Zika está presente desde outubro de 2015, relatou mais de 30 000 casos de infecções pelo vírus da Zika, sendo mais de 5000 delas em gestantes. Até o momento, não existem relatos de casos associados de microcefalia.<sup>48</sup>

De novembro de 2015 a 13 de fevereiro de 2016, foram relatados no Brasil 5280 casos suspeitos de microcefalia e/ou malformação do sistema nervoso central, inclusive 108 óbitos – 1345 destes foram investigados mais profundamente: 837 dos 1345 não tiveram microcefalia, 421 tiveram achados radiológicos, como calcificações cerebrais compatíveis com infecção congênita, e 41 tiveram infecção pelo vírus da Zika confirmada em laboratório.<sup>2</sup>

Uma revisão retrospectiva dos dados de nascimentos na Polinésia Francesa mostrou 18 casos de malformações nervosas centrais em crianças nascidas entre março de 2014 e maio de 2015, inclusive nove casos de microcefalia, em comparação com a média anual nacional prévia de nenhum a dois casos.<sup>2</sup>

### Como é o diagnóstico da infecção pelo vírus da Zika?

#### Clínico

O quadro clínico da infecção pelo vírus da Zika é semelhante ao de outros vírus transmitidos por mosquitos, como a dengue e a chikungunya, que costumam circun-

### Quadro 3 | Causas da microcefalia

- Anormalidades cromossômicas/genéticas
- Craniossinostose (fusão prematura das suturas cranianas)
- Infecção fetal durante a gestação (como rubéola, toxoplasmose, citomegalovírus, varicela, herpes simples)
- Exposição a drogas, álcool e toxinas (como cocaína, antiepiléticos, intoxicação por chumbo ou mercúrio)
- Desnutrição materna grave

#### Quadro 4 | Definição temporária de caso de suspeita de infecção aguda pelo vírus da Zika. Organização Pan-Americana da Saúde<sup>49</sup>

- Erupção cutânea ou aumento na temperatura corporal (>37.2 °C), com qualquer dos sintomas a seguir inexplicado por outras doenças:
- Artralgia ou mialgia
- Conjuntivite não purulenta
- Hiperemia conjuntival
- Cefaleia
- Mal-estar

**Table 1 | Diagnostic tests for Zika virus**

| Sample | Test                      | Timing                                                                                                                        | Reference     |
|--------|---------------------------|-------------------------------------------------------------------------------------------------------------------------------|---------------|
| Blood  | Polymerase chain reaction | Typically <5 days (occasionally up to 8 days) from symptom onset                                                              | <sup>50</sup> |
| Saliva | Polymerase chain reaction | Typically <5 days (occasionally up to 8 days) from symptom onset                                                              | <sup>50</sup> |
| Urine  | Polymerase chain reaction | Very limited data: single study (6 patients)—positive in 6/6 at 10 days from symptom onset, and 1/6 still positive at 30 days | <sup>51</sup> |
| Semen  | Polymerase chain reaction | Very limited data: RNA has been detected at 62 days after symptom onset in one case                                           | <sup>38</sup> |
| Serum  | IgM antibody detection    | Detectable 4-7 days from symptom onset and persists for 2-12 weeks                                                            | <sup>53</sup> |

lar em conjunto nas áreas onde o vírus da Zika é endêmico.

A Organização Pan-Americana da Saúde, da OMS, emitiu uma definição temporária de caso para suspeita de infecção aguda pelo vírus da Zika, destinada ao uso em países com transmissão local em andamento (consulte o Quadro 4).<sup>49</sup>

O diagnóstico diferencial da infecção pelo vírus da Zika é amplo. O diagnóstico é orientado por história (países de viagem, contatos sexuais e contato com outros casos de infecção) e exame. Além de dengue e chikungunya, outros diagnósticos que devem ser considerados incluem soroconversão do HIV, sarampo, escarlatina, infecção por rickettsias, leptospirose, parvovírus, enterovírus, rubéola e sífilis secundária. Os sintomas e sinais clínicos não têm valor preditivo positivo ou negativo suficiente e, portanto, são necessários exames laboratoriais para diagnóstico confiável.

#### Exames laboratoriais

O diagnóstico definitivo se baseia na detecção do RNA do vírus da Zika no sangue (soro ou, idealmente, plasma tratado com EDTA) e outros fluidos corporais por reação em cadeia da polimerase (tabela 1).

#### Principais perguntas de pesquisa

Existem ligações epidemiológicas relatadas entre infecção pelo vírus da Zika na gestação, microcefalia fetal, outras malformações congênitas e síndrome de Guillain-Barré confirmadas por estudos rigorosos?

Existe uma relação causal entre a infecção pelo vírus da Zika na gestação e a microcefalia fetal?

Qual o risco de anormalidade fetal após a infecção pelo vírus da Zika na gestação?

A infecção assintomática pelo vírus da Zika pode resultar em anormalidade fetal?

O teste sorológico é capaz de descartar confiavelmente a infecção recente por vírus da Zika em gestantes?

Qual é a abordagem ideal para o diagnóstico pré-natal de infecção fetal e doença?

Qual é a abordagem ideal para avaliação de neonatos cujas mães tiveram suspeita, mas não confirmação, de infecção pelo vírus da Zika na gestação?

Por quanto tempo o vírus infeccioso persiste no sêmen?

A infecção confere imunidade duradoura?

É possível desenvolver uma vacina segura e eficaz?

#### De que forma pacientes foram envolvidos na criação deste artigo?

*O BMJ* não solicitou aos autores que envolvessem pacientes na criação deste artigo.

#### Outros recursos educacionais 4

##### Recursos para profissionais da saúde

Public Health England ([www.gov.uk/guidance/zika-virus](http://www.gov.uk/guidance/zika-virus)) – orientações, epidemiologia e aconselhamento clínico atualizados para o Reino Unido

Royal College of Obstetrics and Gynaecology ([www.rcog.org.uk/en/news/qas-related-to-zika-virus-and-pregnancy/](http://www.rcog.org.uk/en/news/qas-related-to-zika-virus-and-pregnancy/)) – orientação sobre infecção pelo vírus da Zika na gestação, no formato de perguntas e respostas

Organização Mundial da Saúde ([www.who.int/csr/disease/zika/en/](http://www.who.int/csr/disease/zika/en/)) – folhas de fatos, atualizações epidemiológicas e relatórios semanais de situação, bem como visão geral da resposta global

Organização Pan-Americana da Saúde ([www.paho.org/hq/index.php?option=com\\_content&view=article&id=11599&Itemid=41691&lang=en](http://www.paho.org/hq/index.php?option=com_content&view=article&id=11599&Itemid=41691&lang=en)) – atualizações epidemiológicas, documentos de alerta epidemiológico atual e prévio, detalhamento do histórico da situação atual

Centro Europeu de Prevenção e Controle de Doenças ([http://ecdc.europa.eu/en/healthtopics/zika\\_virus\\_infection/Pages/index.aspx](http://ecdc.europa.eu/en/healthtopics/zika_virus_infection/Pages/index.aspx)) – atualizações epidemiológicas e avaliações de risco da possível associação com o vírus da Zika e neuropatologias; mapas de mosquitos, links para publicações revisadas por pares

Centros de Controle e Prevenção de Doenças ([www.cdc.gov/zika/index.html](http://www.cdc.gov/zika/index.html)) – resumo das informações da OPAS (Organização Pan-Americana da Saúde, consulte o site acima), orientações de saúde nos EUA sobre o vírus da Zika, links para publicações

##### Recursos para pacientes

Travel Health Pro ([travelhealthpro.org.uk/zika-virus-update-and-advice-for-travellers-including-pregnant-women/](http://travelhealthpro.org.uk/zika-virus-update-and-advice-for-travellers-including-pregnant-women/)) ou fitfortravel ([www.fitfortravel.nhs.uk/advice/disease-prevention-advice/zika-virus-infection.aspx](http://www.fitfortravel.nhs.uk/advice/disease-prevention-advice/zika-virus-infection.aspx)) – resumo das informações básicas e foco em orientações de viagem e prevenção

NHS Choices ([www.nhs.uk/Conditions/zika-virus/Pages/Introduction.aspx](http://www.nhs.uk/Conditions/zika-virus/Pages/Introduction.aspx)) – visão geral da infecção pelo vírus da Zika, a situação atual e links para conselhos de viagens

Centro Europeu de Prevenção e Controle de Doenças ([http://ecdc.europa.eu/en/healthtopics/zika\\_virus\\_infection/zika-outbreak/Pages/Frequently-Asked-Questions.aspx](http://ecdc.europa.eu/en/healthtopics/zika_virus_infection/zika-outbreak/Pages/Frequently-Asked-Questions.aspx)) – informações essenciais resumidas em formato de perguntas frequentes, com links úteis

Depois da fase aguda, o diagnóstico por detecção de anticorpos em amostras de soro é comprometido por uma reatividade cruzada considerável com anticorpos contra outros flavivírus; resultados falso-positivos podem ser observados com infecção passada por dengue ou vacina prévia contra febre amarela.<sup>52</sup>

### Como a infecção pelo vírus da Zika é tratada?

Atualmente não existe vacina contra o vírus da Zika nem tratamento antiviral específico para vírus da Zika. O tratamento é sintomático, embora não se saiba quais agentes são ideais para tratar a febre, a coceira e a artralgia. Aconselha-se minimizar a chance de picadas de mosquito usando mangas longas e calça comprida, além de repelente contra insetos.<sup>54</sup> Orientações específicas para viagens são apresentadas no artigo que acompanha este.<sup>55 56</sup>

Está sendo instituído localmente o controle do vetor por inseticidas e remoção de focos de água parada, locais de reprodução do *Aedes*. A OMS está considerando estudos de liberação de mosquitos estéreis irradiados.

**Colaboradores:** Todos os autores fizeram uma pesquisa na literatura e escreveram e revisaram o artigo. IC é o responsável.

**Conflitos de interesses:** Nós lemos e entendemos a política da BMJ quanto a conflitos de interesses e declaramos o seguinte: nenhum.

**Procedência e revisão por pares:** Validada; revisão por pares externos.

- ECDC. Countries and territories with local Zika transmission. Last updated 19 February 2016. Accessed 20 February 2016. [http://ecdc.europa.eu/en/healthtopics/zika\\_virus\\_infection/zika-outbreak/Pages/Zika-countries-with-transmission.aspx](http://ecdc.europa.eu/en/healthtopics/zika_virus_infection/zika-outbreak/Pages/Zika-countries-with-transmission.aspx)
- World Health Organization. Zika situation report 19 February 2016. Accessed 20 February 2016. [http://apps.who.int/iris/bitstream/10665/204454/1/zikasitrep\\_19Feb2016\\_eng.pdf?ua=1](http://apps.who.int/iris/bitstream/10665/204454/1/zikasitrep_19Feb2016_eng.pdf?ua=1)
- Duffy MR, Chen TH, Hancock WT, et al. Zika virus outbreak on Yap Island, Federated States of Micronesia. *N Engl J Med* 2009;360:2536-43. PubMed doi:10.1056/NEJMoa0805715
- Haddow AD, Schuh AJ, Yasuda CY, et al. Genetic characterization of Zika virus strains: geographic expansion of the Asian lineage. *PLoS Negl Trop Dis* 2012;6:e1477. PubMed doi:10.1371/journal.pntd.0001477
- Musso D, Cao-Lormeau VM, Gubler DJ. Zika virus: following the path of dengue and chikungunya? *Lancet* 2015;386:243-4. PubMed doi:10.1016/S0140-6736(15)61273-9
- Rodriguez-Morales AJ. Zika: the new arbovirus threat for Latin America. *J Infect Dev Ctries* 2015;9:684-5. PubMed doi:10.3855/jidc.7230
- World Health Organization. Emergency Committee on Zika virus and observed increase in neurological disorders and neonatal malformations. 1 February 2016. Accessed 10 February 2015. [www.who.int/mediacentre/news/statements/2016/1st-emergency-committee-zika/en/](http://www.who.int/mediacentre/news/statements/2016/1st-emergency-committee-zika/en/)
- Dick GW, Kitchen SF, Haddow AJ. Zika virus. I. Isolations and serological specificity. *Trans R Soc Trop Med Hyg* 1952;46:509-20. PubMed doi:10.1016/0035-9203(52)90042-4
- Kuno G, Chang GJ. Full-length sequencing and genomic characterization of Bagaza, Kedougou, and Zika viruses. *Arch Virol* 2007;152:687-96. PubMed doi:10.1007/s00705-006-0903-z
- Faye O, Freire CC, Iamarino A, et al. Molecular evolution of Zika virus during its emergence in the 20(th) century. *PLoS Negl Trop Dis* 2014;8:e2636. PubMed doi:10.1371/journal.pntd.0002636
- Haddow AJ, Williams MC, Woodall JP, Simpson DI, Goma LK. Twelve isolations of Zika virus from *Aedes* (Stegomyia) *Africanus* (Theobald) taken in and above a Uganda Forest. *Bull World Health Organ* 1964;31:57-69. PubMed
- McCrae AW, Kirya BG. Yellow fever and Zika virus epizootics and enzootics in Uganda. *Trans R Soc Trop Med Hyg* 1982;76:552-62. PubMed doi:10.1016/0035-9203(82)90161-4
- Enfissi A, Codrington J, Roosblad J, Kazanji M, Rousset D. Zika virus genome from the Americas. *Lancet* 2016;387:227-8. PubMed doi:10.1016/S0140-6736(16)00003-9
- Campos GS, Bandeira AC, Sardi SI. Zika virus outbreak, Bahia, Brazil. *Emerg Infect Dis* 2015;21:1885-6. PubMed doi:10.3201/eid2110.150847
- Calvet G, Aguiar RS, Melo ASO et al. Detection and sequencing of Zika virus from amniotic fluid of fetuses with microcephaly in Brazil: a case study. *Lancet Infect Dis* 2016. Published online 17 February 2016. 10.1016/S1473-3099(16)00095-5.
- Cesar de Melo Freire C, Atila I, Ferreira de Lima Neto D, et al. Spread of the pandemic Zika virus lineage is associated with NS1 codon usage adaptation in humans. *bioRxiv* 2015. doi:10.1101/032839.
- Buckley A, Gould EA. Detection of virus-specific antigen in the nuclei or nucleoli of cells infected with Zika or Langat virus. *J Gen Virol* 1988;69:1913-20. PubMed doi:10.1099/0022-1317-69-8-1913
- Hamel R, Dejarnac O, Wicht S, et al. Biology of Zika virus infection in human skin cells. *J Virol* 2015;89:8880-96. PubMed doi:10.1128/JVI.00354-15
- Simpson DI. Zika virus infection in man. *Trans R Soc Trop Med Hyg* 1964;58:335-8. PubMed doi:10.1016/0035-9203(64)90201-9
- MacNamara FN. Zika virus: a report on three cases of human infection during an epidemic of jaundice in Nigeria. *Trans R Soc Trop Med Hyg* 1954;48:139-45. PubMed doi:10.1016/0035-9203(54)90006-1
- Jan C, Languillat G, Renaudet J, Robin Y. [A serological survey of arboviruses in Gabon]. *Bull Soc Pathol Exot Filiales* 1978;71:140-6. PubMed
- Fagbami AH. Zika virus infections in Nigeria: virological and seroepidemiological investigations in Oyo State. *J Hyg (Lond)* 1979;83:213-9. PubMed doi:10.1017/S0022172400025997
- Smithburn KC. Neutralising antibodies against arthropod-borne viruses in the ser of long term residents of Malaya and Borneo. 1954.
- Darwish MA, Hoogstraal H, Roberts TJ, Ahmed IP, Omar F. A sero-epidemiological survey for certain arboviruses (Togaviridae) in Pakistan. *Trans R Soc Trop Med Hyg* 1983;77:442-5. PubMed doi:10.1016/0035-9203(83)90106-2
- Olson JG, Ksiazek TG, Suhandiman, Triwibowo. Zika virus, a cause of fever in central Java, Indonesia. *Trans R Soc Trop Med Hyg* 1981;75:389-93.
- Mallet HP, Vial AL, Musso D. BISES: Bulletin d'information sanitaire, épidémiologiques et statistiques. Papeete: Bureau de veille sanitaire (BVS) Polynésie française, May 2015. Accessed 15 January 2016. [www.hygiene-publique.gov.pf/IMG/pdf/no13\\_-\\_mai\\_2015\\_-\\_zika.pdf](http://www.hygiene-publique.gov.pf/IMG/pdf/no13_-_mai_2015_-_zika.pdf)
- Cao-Lormeau VM, Roche C, Teissier A, et al. Zika virus, French polynesia, South pacific, 2013. *Emerg Infect Dis* 2014;20:1085-6. PubMed doi:10.3201/eid2011.141380
- Tognarelli J, Ulloa S, Villagra E, et al. A report on the outbreak of Zika virus on Easter Island, South Pacific, 2014. *Arch Virol* 2015. PubMed
- Da Saude M. (Brazil). Situacao Confirmacao do Zika virus no Brasil. Brasilia: Monisterion da Saude Brazil; May 2015. Accessed 10 January 2016. <http://portalsaude.saude.gov.br/index.php/cidado/principal/agencia-saude/17701-confirmacao-do-zika-virus-no-brasil>
- Marchette NJ, Garcia R, Rudnick A. Isolation of Zika virus from *Aedes aegypti* mosquitoes in Malaysia. *Am J Trop Med Hyg* 1969;18:411-5. PubMed
- Li MI, Wong PSJ, Ng LC, Tan CH. Oral susceptibility of Singapore *Aedes* (Stegomyia) *aegypti* (Linnaeus) to Zika virus. *PLoS Negl Trop Dis* 2012;6:e1792. PubMed doi:10.1371/journal.pntd.0001792
- Boorman JPT, Porterfield JS. A simple technique for infection of mosquitoes with viruses; transmission of Zika virus. *Trans R Soc Trop Med Hyg* 1956;50:238-42. PubMed doi:10.1016/0035-9203(56)90029-3
- Grard G, Caron M, Mombou IM, et al. Zika virus in Gabon (Central Africa)—2007: a new threat from *Aedes albopictus*? *PLoS Negl Trop Dis* 2014;8:e2681. PubMed doi:10.1371/journal.pntd.0002681
- Wong PS, Li MZ, Chong CS, Ng LC, Tan CH. *Aedes* (Stegomyia) *albopictus* (Skuse): a potential vector of Zika virus in Singapore. *PLoS Negl Trop Dis* 2013;7:e2348. PubMed doi:10.1371/journal.pntd.0002348
- World Health Organization. Disease outbreak news: Zika virus infection—United States of America. Accessed 12 February 2016. [www.who.int/csr/don/12-february-2016-zika-usa/en/](http://www.who.int/csr/don/12-february-2016-zika-usa/en/)
- Foy BD, Kobylinski KC, Chilson Foy JL, et al. Probable non-vector-borne transmission of Zika virus, Colorado, USA. *Emerg Infect Dis* 2011;17:880-2. PubMed doi:10.3201/eid1705.101939
- Musso D, Roche C, Robin E, Nhan T, Teissier A, Cao-Lormeau VM. Potential sexual transmission of Zika virus. *Emerg Infect Dis* 2015;21:359-61. PubMed doi:10.3201/eid2102.141363
- Atkinson B, Hearn P, Afrough B, et al. Detection of Zika virus in semen [letter]. *Emerg Infect Dis* 2016. Accessed 20 February 2016. doi:10.3201/eid2205.160107
- Musso D, Nhan T, Robin E, et al. Potential for Zika virus transmission through blood transfusion demonstrated during an outbreak in French Polynesia, November 2013 to February 2014. *Euro Surveill* 2014;19:20761. PubMed doi:10.2807/1560-7917ES2014.19.14.20761
- Besnard M, Lastère S, Teissier A, Cao-Lormeau V, Musso D. Evidence of perinatal transmission of Zika virus, French Polynesia, December 2013 and February 2014. *Euro Surveill* 2014;19:20751. PubMed doi:10.2807/1560-7917ES2014.19.13.20751
- Ioos S, Mallet HP, Leparc Goffart I, Gauthier V, Cardoso T, Herida M. Current Zika virus epidemiology and recent epidemics. *Med Mal Infect* 2014;44:302-7. PubMed doi:10.1016/j.medmal.2014.04.008
- Thomas DL, Sharp TM, Torres J, et al. Local transmission of Zika virus—Puerto Rico, November 23, 2015–January 28, 2016. *MMWR Morb Mortal Wkly Rep* 2016;65:154-8. PubMed doi:10.15585/mmwr.mm6506e2

- 43 Musso D, Nhan TX. Emergence of Zika virus. *Clin Microbiol* 2015;4:222. doi:10.4172/2327-5073.1000222
- 44 World Health Organization. Zika virus: news and updates. Accessed 19 February 2016. [www.who.int/emergencies/zika-virus/timeline-update/en/](http://www.who.int/emergencies/zika-virus/timeline-update/en/).
- 45 Pan American Health Organization. Epidemiological alert: neurological syndrome, congenital malformations, and Zika virus infection. Implications for public health in the Americas. 1 December 2015. [www.paho.org/hq/index.php?option=com\\_docman&task=doc\\_view&Itemid=270&gid=32405&lang=en](http://www.paho.org/hq/index.php?option=com_docman&task=doc_view&Itemid=270&gid=32405&lang=en).
- 46 Schuler-Faccini L, Ribeiro EM, Feitosa IM, et al; Brazilian Medical Genetics Society—Zika Embryopathy Task Force. Possible association between Zika virus infection and Microcephaly—Brazil, 2015. *MMWR Morb Mortal Wkly Rep* 2016;65:59-62. [www.cdc.gov/mmwr/volumes/65/wr/mm6503e2.htm](http://www.cdc.gov/mmwr/volumes/65/wr/mm6503e2.htm) PubMed doi:10.15585/mmwr.mm6503e2
- 47 Soares de Araújo JS, Regis CT, Gomes RGS, et al. Microcephaly in northeast Brazil: a review of 16 208 births between 2012 and 2015. *Bull World Health Org* 2016;4. doi:10.2471/BLT.16.170639.
- 48 Symmes Cobb J, Jaime Acosta L. Colombia's forecast on Zika-linked birth defect may be too high: minister. *Reuters.com*. Accessed 19 February 2016. [www.reuters.com/article/us-health-zika-colombia-idUSKCN0VQ2AB](http://www.reuters.com/article/us-health-zika-colombia-idUSKCN0VQ2AB).
- 49 Pan American Health Organization. Epidemiological alert: neurological syndrome, congenital malformations, and Zika virus infection. Implications for public health in the Americas 1 December 2015. [www.paho.org/hq/index.php?option=com\\_docman&task=doc\\_view&Itemid=270&gid=32405&lang=en](http://www.paho.org/hq/index.php?option=com_docman&task=doc_view&Itemid=270&gid=32405&lang=en).
- 50 Musso D, Roche C, Nhan TX, Robin E, Teissier A, Cao-Lormeau VM. Detection of Zika virus in saliva. *J Clin Virol* 2015;68:53-5. PubMed doi:10.1016/j.jcv.2015.04.021
- 51 Gourinat AC, O'Connor O, Calvez E, Goarant C, Dupont-Rouzeyrol M. Detection of Zika virus in urine. *Emerg Infect Dis* 2015;21:84-6. PubMed doi:10.3201/eid2101.140894
- 52 Charrel RN, Leparc-Goffart I, Pas S, de Lamballerie X, Koopmans M, Reusken C. State of knowledge on Zika virus for an adequate laboratory response. *Bull World Health Organ* 2016; doi:10.2471/BLT.16.171207.
- 53 Centres for Disease Control. Revised diagnostic testing for Zika, chikungunya, and dengue viruses in US Public Health Laboratories. Released 7 February 2016. Accessed 12 February 2016. [www.cdc.gov/zika/pdfs/denvchikvzikk-testing-algorithm.pdf](http://www.cdc.gov/zika/pdfs/denvchikvzikk-testing-algorithm.pdf)
- 54 Stanczyk NM, Behrens RH, Chen-Hussey V, Stewart SA, Logan JG. Mosquito repellents for travellers. *BMJ* 2015;350:h99. PubMed doi:10.1136/bmj.h99
- 55 Ahmad SSY, Amin TN, Ustianowski A. Zika virus: management of infection and risk. *BMJ* 2016;352:i1062. doi:10.1136/bmj.i1062.
- 56 Scotland HP. NHS National Services Scotland. fitfortravel. Zika virus infection. <http://www.fitfortravel.nhs.uk/advice/disease-prevention-advice/zika-virus-infection.aspx>
- 57 Hawaiian Department of Health. DOH news release: Hawaii Department of Health receives confirmation of Zika infection in baby born with microcephaly. Accessed 10 February 2016. <http://governor.hawaii.gov/newsroom/doh-news-release-hawaii-department-of-health-receives-confirmation-of-zika-infection-in-baby-born-with-microcephaly>.
- 58 Martines RB, Bhatnagar J, Keating MK, et al. Notes from the field: evidence of Zika virus infection in brain and placental tissues from two congenitally infected newborns and two fetal losses—Brazil, 2015. *MMWR Morb Mortal Wkly Rep* 2016;65:159-60. PubMed doi:10.15585/mmwr.mm6506e1
- 59 Mlakar J, Korva M, Tul N, et al. Zika virus associated with microcephaly. *N Engl J Med* 2016. PubMed doi:10.1056/NEJMoa1600651
- 60 World Health Organization. Disease outbreak news. Guillain-Barre syndrome—France—Martinique. Released 8 February 2016. [www.who.int/csr/don/8-february-2016-gbs-france-martinique/en/](http://www.who.int/csr/don/8-february-2016-gbs-france-martinique/en/).
